# Supplementary material
Source: PubMed Central journal article supplement (PMC6026229)
Supplement: mmc1.pdf [file mmc1.pdf]

# Cardiac Troponin Values in Patients With Acute Coronary Syndrome and Sleep Apnea

## A Pilot Study

*Alicia Sánchez-de-la-Torre, PhD; Xavier Soler, MD, PhD; Ferran Barbé, MD, PhD; Marina Florés, MD; Alan Maisel, MD, PhD; Atul Malhotra, MD, PhD; Montserrat Rue, PhD; Sandra Bertran, MSc; Albina Aldomá, MD; Fernando Worner, MD, PhD; Joan Valls, PhD; Chi-Hang Lee, MD, PhD; Cecilia Turino, MD; Estefanía Galera, MD; Jordi de Batlle, PhD; Manuel Sánchez-de-la-Torre, PhD; on behalf of the Spanish Sleep Network*

CHEST 2018; 153(2):329-338

*Online supplements are not copyedited prior to posting and the author(s) take full responsibility for the accuracy of all data.*

© 2017 AMERICAN COLLEGE OF CHEST PHYSICIANS. Reproduction of this article is prohibited without written permission from the American College of Chest Physicians. See online for more details. DOI: 10.1016/j.chest.2017.06.046

## **e-Appendix 1.**

### **1. e-Results**

#### **1.1 Anthropometric, clinical, and treatment characteristics of patients with non-OSA, low-to-moderate-severity OSA and high-severity OSA (OSA severity considered based on observed AHI median values).**

To further investigate the strength of the impact of OSA severity-related variables on the time course of cTn expression, we classified the OSA patients into two groups according to the observed AHI median value (median AHI for OSA patients=32 events·h<sup>-1</sup>). We differentiated between OSA patients with low-to-moderate-severity AHI (AHI 15-32 events·h<sup>-1</sup>) and OSA patients with high-severity AHI (AHI>32 events·h<sup>-1</sup>).

**e-Table 1. Anthropometric, clinical, and treatment characteristics of patients with non-obstructive sleep apnea, low-to-moderate-severity obstructive sleep apnea and high-severity obstructive sleep apnea.**

|                                                              | Group                         |                              |                           | p-value |
|--------------------------------------------------------------|-------------------------------|------------------------------|---------------------------|---------|
|                                                              | Non-OSA<br>(AHI<15)<br>(n=38) | OSA<br>(AHI 15-32)<br>(n=45) | OSA<br>(AHI>32)<br>(n=44) |         |
| Age, years, mean (SD)                                        | 64.4 (13.1)                   | 62.8 (11.6)                  | 64.5 (11.5)               | 0.757   |
| Gender, n (%)                                                |                               |                              |                           | 0.96    |
| Male                                                         | 32 (84.2%)                    | 37 (82.2%)                   | 36 (81.8%)                |         |
| Female                                                       | 6 (15.8%)                     | 8 (17.8%)                    | 8 (18.2%)                 |         |
| Apnea-hypopnea index events·h <sup>-1</sup> , median [IQR]   | 4.8 [1.6;9.6]                 | 20.8 [17.8;26.0]             | 47.0 [39.7;55.1]          | <0.0001 |
| Oxygen desaturation index >4% h <sup>-1</sup> , median [IQR] | 4.6 [3.5;10.1]                | 15.1 [7.8;24.5]              | 32.2 [6.4;44.2]           | <0.001  |
| Minimum SaO <sub>2</sub> , %, median [IQR]                   | 87.0 [84.0;89.0]              | 84.0 [81.0;87.0]             | 82.0 [75.5;86.5]          | 0.005   |
| Mean SaO <sub>2</sub> , %, median [IQR]                      | 93.3 [92.1;94.1]              | 93.1 [91.9;94.2]             | 92.6 [91.7;94.1]          | 0.868   |
| Time with SaO <sub>2</sub> <90%, %, median [IQR]             | 1.6 [0.2;10.0]                | 3.8 [0.7;12.6]               | 8.9 [1.4;15.9]            | 0.237   |
| Epworth Sleepiness Scale, median [IQR]                       | 3.0 [3.0;4.2]                 | 5.0 [3.0;6.0]                | 4.0 [3.0;6.5]             | 0.053   |
| Hypertensive patients, n (%)                                 | 24 (63.2%)                    | 27 (60.0%)                   | 34 (77.3%)                | 0.188   |
| Body mass index, kg·m <sup>-2</sup> , median [IQR]           | 26.4 [24.6;30.0]              | 27.6 [25.2;31.0]             | 27.7 [24.9;29.5]          | 0.579   |
| Neck circumference, cm, n (%)                                | 42.0 [39.5;43.5]              | 40.0 [39.0;42.0]             | 41.0 [40.0;42.0]          | 0.443   |
| Diabetes mellitus, n (%)                                     | 10 (26.3%)                    | 14 (31.1%)                   | 19 (44.2%)                | 0.21    |
| Dyslipidemia, n (%)                                          | 18 (47.4%)                    | 27 (60.0%)                   | 26 (59.1%)                | 0.447   |
| Peak cTn-I, ng·ml <sup>-1</sup>                              | 10.7 [1.8;40.1]               | 5.2 [0.9;24.3]               | 2.4 [0.2;20.0]            | 0.058   |
| Area under the peak cTn-I                                    | 451 [79.8;1533]               | 183 [47.8;741]               | 113 [7.06;855]            | 0.08    |
| Type of ACS, n (%)                                           |                               |                              |                           |         |
| Unstable angina                                              | 4 (10.5%)                     | 3 (6.67%)                    | 6 (13.6%)                 | 0.510   |
| Non-STEMI                                                    | 15 (39.5%)                    | 23 (51.1%)                   | 24 (54.5%)                |         |
| STEMI                                                        | 19 (50.0%)                    | 19 (42.2%)                   | 14 (31.8%)                |         |
| First episode of ACS, n (%)                                  | 28 (73.7%)                    | 36 (80.0%)                   | 34 (77.3%)                | 0.8     |
| Cardiomyopathy, n (%)                                        | 11 (28.9%)                    | 13 (28.9%)                   | 15 (34.9%)                | 0.79    |
| Stroke, n (%)                                                | 1 (2.7%)                      | 3 (6.7%)                     | 0 (0%)                    | 0.21    |
| Killip class, median [IQR]                                   | 1.0 [1.0;1.0]                 | 1.0 [1.0;3.0]                | 1.0 [1.0;2.0]             | 0.93    |
| Number of affected vessels, median [IQR]                     | 1.0 [1.0;2.0]                 | 1.0 [1.0;3.0]                | 2.0 [1.0;2.0]             | 0.845   |
| Number of stents, median [IQR]                               | 1.0 [0.0;1.0]                 | 1.0 [1.0;2.0]                | 1.0 [1.0;2.0]             | 0.03    |
| Location of intervened lesions                               |                               |                              |                           | 0.45    |
| No lesion                                                    | 3 (9.68%)                     | 3 (7.50%)                    | 5 (13.9%)                 |         |
| Proximal                                                     | 9 (29.0%)                     | 20 (50.0%)                   | 14 (38.9%)                |         |
| Medial                                                       | 16 (51.6%)                    | 13 (32.5%)                   | 11 (30.6%)                |         |
| Distal                                                       | 3 (9.68%)                     | 4 (10.0%)                    | 6 (16.7%)                 |         |

|                                                  |                  |                  |                  |       |
|--------------------------------------------------|------------------|------------------|------------------|-------|
| Smoker, n (%)                                    |                  |                  |                  | 0.36  |
| Former smoker                                    | 11 (28.9%)       | 8 (17.8%)        | 16 (36.4%)       |       |
| No                                               | 13 (34.2%)       | 15 (33.3%)       | 13 (29.5%)       |       |
| Yes                                              | 14 (36.8%)       | 22 (48.9%)       | 15 (34.1%)       |       |
| Total tobacco exposure, pack-years, median [IQR] | 20.0 [15.0;30.0] | 29.5 [20.0;46.5] | 22.5 [7.75;36.2] | 0.3   |
| Alcohol use, n (%)                               |                  |                  |                  | 0.77  |
| Former alcohol consumption                       | 2 (6.5%)         | 0 (0%)           | 1 (3.6%)         |       |
| No                                               | 24 (77.4%)       | 31 (86.1%)       | 23 (82.1%)       |       |
| Yes                                              | 5 (16.1%)        | 5 (13.9%)        | 4 (14.3%)        |       |
| Diuretics, n (%)                                 | 17 (44.7%)       | 10 (22.7%)       | 16 (37.2%)       | 0.1   |
| Anticoagulants, n (%)                            | 6 (15.8%)        | 6 (13.6%)        | 10 (23.8%)       | 0.435 |
| Antacids, n (%)                                  | 11 (28.9%)       | 17 (38.6%)       | 18 (42.9%)       | 0.422 |
| Hypolipidemics, n (%)                            | 12 (31.6%)       | 18 (40.9%)       | 18 (41.9%)       | 0.582 |
| β-blockers, n (%)                                | 17 (44.7%)       | 14 (31.8%)       | 19 (44.2%)       | 0.387 |
| Antiplatelet agents, n (%)                       | 6 (15.8%)        | 8 (18.2%)        | 7 (16.7%)        | 0.958 |
| Bronchodilators, n (%)                           | 3 (7.9%)         | 4 (9.1%)         | 1 (2.4%)         | 0.432 |
| Oral antidiabetic drugs, n (%)                   | 7 (18.4%)        | 10 (22.7%)       | 16 (37.2%)       | 0.126 |
| Insulin, n (%)                                   | 1 (2.6%)         | 4 (9.1%)         | 6 (14.6%)        | 0.195 |
| Calcium antagonists, n (%)                       | 2 (5.3%)         | 10 (22.7%)       | 10 (23.3%)       | 0.06  |

**cTn-I, cardiac troponin-IM; IQR, interquartile range; AHI, apnea-hypopnea index (number of events·h<sup>-1</sup>).**
